# Supplementary material
Source: PubMed Central journal article supplement (PMC7704101)
Supplement: NIHMS1570845-supplement-5.pdf [file NIHMS1570845-supplement-5.pdf]

**Supplemental Table 3. Gene numbers regulated by PJA1 knockdown and TGF- $\beta$ 1 treatment.**

| Cell treatment           | Gene regulation | Gene No. | co-regulation in both PJA1 knockdown and TGF- $\beta$ 1 treatment | Gene No. |
|--------------------------|-----------------|----------|-------------------------------------------------------------------|----------|
| PJA1 knockdown           | upregulated     | 3055     | co-upregulated                                                    | 1584     |
|                          | downregulated   | 3786     |                                                                   |          |
| TGF- $\beta$ 1 treatment | upregulated     | 3324     | co-downregulated                                                  | 1280     |
|                          | downregulated   | 2544     |                                                                   |          |
