# Supplementary material
Source: PubMed Central journal article supplement (PMC7704101)
Supplement: NIHMS1570845-supplement-6.pdf [file NIHMS1570845-supplement-6.pdf]

**Supplementary Table 4. Characteristics of HCC patients with PJA1 genetic alterations.**

| Type of PJA1 alteration     | Gender | Age   | Race                      | Etiology                | Grade | Tumor resection | Stage   | Vital status | Overall survival (Month) |
|-----------------------------|--------|-------|---------------------------|-------------------------|-------|-----------------|---------|--------------|--------------------------|
| mRNA level increased*       | Female | 61    | Asian                     | Missing                 | G1    | RX              | IIIC    | Dead         | 2.86                     |
|                             | Male   | 44    | Asian                     | Missing                 | G2    | RX              | II      | Dead         | 3.19                     |
|                             | Male   | 35    | Asian                     | None                    | G1    | RX              | IIIA    | Dead         | 4.24                     |
|                             | Male   | 71    | Asian                     | Missing                 | G2    | RX              | IIIA    | Dead         | 3.35                     |
|                             | Male   | 69    | White                     | Alcohol                 | G2    | R1              | Missing | Dead         | 27.5                     |
|                             | Male   | 42    | Block or african american | HCV                     | G3    | R0              | II      | Dead         | 37.75                    |
|                             | Male   | 23    | Block or african american | Hepatitis B             | G3    | R0              | II      | Dead         | 13.63                    |
|                             | Male   | 50    | Asian                     | None                    | G3    | Missing         | IIIA    | Dead         | 3.32                     |
|                             | Male   | 45    | Asian                     | Alcohol                 | G3    | R0              | IIIA    | Dead         | 9.86                     |
|                             | Male   | 73    | White                     | Alcohol                 | G2    | Missing         | IIIA    | Alive        | 11.93                    |
|                             | Male   | 47    | Asian                     | Missing                 | G2    | R0              | II      | Alive        | 29.89                    |
|                             | Male   | 54    | Asian                     | Alcohol                 | G3    | R0              | IIIA    | Alive        | 13.11                    |
|                             | Male   | 56    | Asian                     | Alcohol                 | G3    | R0              | II      | Alive        | 12.55                    |
|                             | Female | 39    | Asian                     | None                    | G3    | R0              | IIIA    | Dead         | 11.3                     |
|                             | Male   | 68    | White                     | HCV                     | G3    | R0              | IIIA    | Dead         | 13.53                    |
|                             | Male   | 51    | White                     | HCV                     | G2    | R0              | Missing | Dead         | 25.13                    |
|                             | Male   | 49    | White                     | Alcohol and HBV and HCV | G1    | R0              | IIIA    | Alive        | 120.73                   |
|                             | Male   | 68    | Block or african          | Alcohol and HBV         | G2    | R0              | I       | Alive        | 47.7                     |
| Male                        | 61     | Asian | HBV                       | G1                      | R0    | II              | Alive   | 0.66         |                          |
| mRNA level decreased*       | Male   | 65    | White                     | Alcohol                 | G2    | R0              | IIIB    | Alive        | 22.04                    |
|                             | Female | 52    | Asian                     | HBV                     | G2    | R0              | IIIA    | Alive        | Missing                  |
|                             | Male   | 69    | Asian                     | None                    | G2    | R0              | I       | Alive        | 53.65                    |
| Missense mutation (E401G)   | Female | 46    | White                     | HCV                     | G2    | R0              | I       | Dead         | 19.58                    |
| Truncating mutation (D276*) | Male   | 80    | White                     | Alcohol                 | G2    | R0              | Missing | Dead         | 5.03                     |

\*: Cutoff, z-Scores threshold  $\pm 2.0$ .
